# Supplementary material
Source: publisher figshare collection journal article supplement (https://geolsoc.figshare.com/ndownloader/files/27340177)
Supplement: Supplementary file 1 [file 27340177]

## Sheet: Sheet1
Table S3 Zircon LA-ICP MS U-Pb isotopic data of Carboniferous clastic rocks from the Darbut region.
Samples	Th (ppm)	U (ppm)	Th/U	Ratios						Age (Ma)						Concordant age	± 1s
				207Pb/206Pb	± 1s	207Pb/235U	± 1s	206Pb/238U	± 1s	207Pb/206Pb	± 1s	207Pb/235U	± 1s	206Pb/238U	± 1s
Xibeikulasi Formation, sandstone xb-15
Zr.1	27.94	50.34	0.555026	0.05222	0.00794	0.39626	0.0591	0.05503	0.00181	295	272	339	43	345	11	345	11
Zr.2	40.2	49.42	0.813436	0.05062	0.008	0.38027	0.05898	0.05447	0.00182	224	274	327	43	342	11	342	11
Zr.3	101.72	107.18	0.949058	0.05858	0.00711	0.42675	0.05067	0.05282	0.00151	552	212	361	36	332	9	332	9
Zr.4	169.77	181.42	0.935784	0.05656	0.00438	0.42027	0.03183	0.05388	0.00104	474	134	356	23	338	6	338	6
Zr.5	66.6	83.44	0.798178	0.05764	0.00659	0.42632	0.04767	0.05363	0.00143	516	201	361	34	337	9	337	9
Zr.6	95.11	96.6	0.984576	0.0595	0.00517	0.43458	0.03694	0.05297	0.00114	585	148	366	26	333	7	333	7
Zr.7	58.36	71.32	0.818284	0.05675	0.00729	0.41621	0.05234	0.05318	0.00157	482	228	353	38	334	10	334	10
Zr.8	62.09	86.04	0.721641	0.05591	0.0067	0.41004	0.04811	0.05318	0.00145	449	214	349	35	334	9	334	9
Zr.9	50.82	76.18	0.667104	0.05767	0.00709	0.43072	0.05178	0.05416	0.00155	517	217	364	37	340	9	340	9
Zr.10	56.5	69.1	0.817656	0.04958	0.00699	0.37393	0.05177	0.0547	0.00162	175	250	323	38	343	10	343	10
Zr.11	40.88	91.74	0.445607	0.05641	0.00651	0.42402	0.04789	0.05451	0.00146	469	205	359	34	342	9	342	9
Zr.12	45.59	70.09	0.650449	0.05018	0.00685	0.37906	0.05079	0.05478	0.00161	203	243	326	37	344	10	344	10
Zr.13	39.87	57.78	0.690031	0.06041	0.00862	0.45662	0.06373	0.05481	0.0018	618	250	382	44	344	11	344	11
Zr.14	51.62	77.39	0.667011	0.05071	0.00675	0.38579	0.0504	0.05517	0.00159	228	241	331	37	346	10	346	10
Zr.15	37.21	49.17	0.756762	0.05468	0.00929	0.40754	0.06792	0.05405	0.00192	399	306	347	49	339	12	339	12
Zr.16	77.73	110.95	0.700586	0.05678	0.00745	0.40789	0.05241	0.05209	0.00156	483	233	347	38	327	10	327	10
Zr.17	49.82	83.43	0.597147	0.05528	0.00697	0.40008	0.04942	0.05248	0.00148	424	226	342	36	330	9	330	9
Zr.18	36.12	58.81	0.614181	0.05542	0.00808	0.41981	0.05994	0.05493	0.00177	429	262	356	43	345	11	345	11
Zr.19	35.7	51.69	0.690656	0.05094	0.00813	0.37185	0.05826	0.05294	0.00176	238	281	321	43	333	11	333	11
Zr.20	257.25	170.06	1.5127	0.05585	0.00609	0.40358	0.04308	0.05241	0.00134	446	194	344	31	329	8	329	8
Zr.21	81.42	153.12	0.53174	0.05988	0.00671	0.43608	0.04772	0.05281	0.00143	599	193	367	34	332	9	332	9
Zr.22	72.12	100.93	0.714555	0.05305	0.00581	0.39885	0.04284	0.05453	0.00136	331	197	341	31	342	8	342	8
Zr.23	52.97	85.2	0.621714	0.05445	0.0066	0.39887	0.04737	0.05313	0.00143	390	218	341	34	334	9	334	9
Zr.24	175.4	265.04	0.661787	0.05559	0.00352	0.43455	0.02692	0.05669	0.00095	436	108	366	19	355	6	355	6
Zr.25	104.83	165.35	0.633989	0.05359	0.00441	0.41384	0.03333	0.056	0.00112	354	146	352	24	351	7	351	7
Zr.26	35.16	49.05	0.71682	0.04938	0.0081	0.37197	0.05994	0.05463	0.00185	166	274	321	44	343	11	343	11
Zr.27	52.89	59.13	0.89447	0.05818	0.00807	0.43451	0.05895	0.05416	0.00171	537	245	366	42	340	10	340	10
Zr.28	83.81	81.5	1.02834	0.05078	0.00651	0.37024	0.04659	0.05288	0.00145	231	233	320	35	332	9	332	9
Zr.29	51.94	69.73	0.744873	0.05364	0.00674	0.40627	0.04998	0.05493	0.00157	356	224	346	36	345	10	345	10
Zr.30	67.7	102.52	0.660359	0.05794	0.00594	0.42185	0.04227	0.0528	0.00129	527	179	357	30	332	8	332	8
Zr.31	49.95	70.81	0.705409	0.05021	0.00687	0.36617	0.0492	0.0529	0.00154	205	245	317	37	332	9	332	9
Zr.32	29.02	39.89	0.727501	0.0595	0.01002	0.43641	0.07189	0.0532	0.00203	585	297	368	51	334	12	334	12
Zr.33	46.17	66.21	0.697327	0.05032	0.00709	0.37637	0.0521	0.05425	0.00161	210	253	324	38	341	10	341	10
Zr.34	42.99	63.79	0.67393	0.05695	0.01028	0.41655	0.07357	0.05305	0.00212	490	319	354	53	333	13	333	13
Zr.35	59.17	115.86	0.510703	0.0552	0.00519	0.40702	0.03743	0.05348	0.00121	420	166	347	27	336	7	336	7
Zr.36	24.91	51.54	0.483314	0.05626	0.00821	0.41175	0.05878	0.05308	0.00174	463	261	350	42	333	11	333	11
Zr.37	41.84	55.12	0.759071	0.05003	0.0077	0.36305	0.05491	0.05263	0.00168	196	268	314	41	331	10	331	10
Zr.38	52.96	55.24	0.958726	0.04776	0.00935	0.34492	0.06628	0.05238	0.0021	87	292	301	50	329	13	329	13
Zr.39	161.7	150.32	1.07571	0.05558	0.00634	0.40661	0.04538	0.05306	0.00141	436	202	346	33	333	9	333	9
Zr.40	128.29	139.18	0.921756	0.05104	0.00461	0.38191	0.03383	0.05427	0.00114	243	162	328	25	341	7	341	7
Zr.41	84.57	199.47	0.423974	0.05282	0.00403	0.3839	0.02874	0.05271	0.00096	321	137	330	21	331	6	331	6
Zr.42	35.7	45.65	0.782037	0.05133	0.00935	0.3719	0.06662	0.05255	0.00192	256	306	321	49	330	12	330	12
Zr.43	61.31	80.11	0.765323	0.0553	0.00716	0.40739	0.05163	0.05344	0.00156	424	231	347	37	336	10	336	10
Zr.44	64.46	93.5	0.689412	0.05657	0.00945	0.40953	0.06691	0.0525	0.002	475	297	349	48	330	12	330	12
Zr.45	47.68	63.58	0.749921	0.05375	0.00829	0.39114	0.0592	0.05278	0.00172	361	277	335	43	332	11	332	11
Zr.46	43.26	66.59	0.649647	0.05582	0.00894	0.41066	0.06448	0.05336	0.00187	445	288	349	46	335	11	335	11
Zr.47	22.37	37.75	0.592583	0.05173	0.01298	0.38431	0.09494	0.05389	0.00258	273	385	330	70	338	16	338	16
Zr.48	49.09	112.6	0.435968	0.05736	0.00853	0.43388	0.0632	0.05486	0.00183	505	265	366	45	344	11	344	11
Zr.49	222.98	326.92	0.682063	0.05314	0.00558	0.39435	0.0406	0.05383	0.00128	335	189	338	30	338	8	338	8
Xibeikulasi Formation, granite gravel xb-10
Zr.1	70.05	108.5	0.645622	0.05765	0.00543	0.43709	0.04022	0.05499	0.00126	516	163	368	28	345	8	345	8
Zr.2	97.46	165.5	0.588882	0.05558	0.00263	0.42129	0.01955	0.05498	0.00076	436	79	357	14	345	5	345	5
Zr.3	50.13	71.25	0.703579	0.04976	0.00713	0.37407	0.05262	0.05453	0.00166	184	253	323	39	342	10	342	10
Zr.4	44.52	395.18	0.112658	0.056	0.00354	0.41987	0.02566	0.05438	0.00087	452	144	356	18	341	5	341	5
Zr.5	113.67	274.91	0.413481	0.05658	0.0038	0.42419	0.02785	0.05438	0.00095	475	115	359	20	341	6	341	6
Zr.6	69.04	318.11	0.217032	0.05973	0.00538	0.4449	0.03908	0.05402	0.00106	594	202	374	27	339	7	339	7
Zr.7	73.3	101.76	0.720322	0.05912	0.00766	0.44462	0.05627	0.05455	0.00167	572	226	374	40	342	10	342	10
Baogutu Formation, sandstone bg-21
Zr.1	76.89	121.79	0.631333	0.05094	0.00576	0.36348	0.04027	0.05172	0.00135	238	201	315	30	325	8	325	8
Zr.2	54.17	65.78	0.823503	0.05499	0.00699	0.39261	0.04885	0.05176	0.00153	412	225	336	36	325	9	325	9
Zr.3	48.6	78.86	0.616282	0.04953	0.00522	0.35368	0.03658	0.05175	0.00123	173	188	307	27	325	8	325	8
Zr.4	51.93	117.95	0.440271	0.05591	0.00453	0.39899	0.03166	0.05172	0.00105	449	141	341	23	325	6	325	6
Zr.5	183.56	250.24	0.733536	0.05398	0.00377	0.38555	0.02635	0.05176	0.00094	370	122	331	19	325	6	325	6
Zr.6	209.68	248.08	0.845211	0.05141	0.00249	0.36899	0.01753	0.05206	0.00076	259	82	319	13	327	5	327	5
Zr.7	484.15	607.36	0.797138	0.05604	0.00172	0.42769	0.01289	0.05536	0.00068	454	45	362	9	347	4	347	4
Zr.8	150.43	222.42	0.676333	0.05511	0.00276	0.3898	0.01911	0.05131	0.00077	417	83	334	14	323	5	323	5
Zr.9	52.59	77.24	0.680865	0.0575	0.00501	0.43266	0.03688	0.05459	0.00118	511	150	365	26	343	7	343	7
Zr.10	144.46	210.4	0.686597	0.0571	0.00295	0.41021	0.02076	0.05212	0.0008	495	84	349	15	328	5	328	5
Zr.11	78.2	131.21	0.595991	0.05334	0.00351	0.40709	0.02626	0.05537	0.00097	343	115	347	19	347	6	347	6
Zr.12	111.52	190.58	0.585161	0.05247	0.0029	0.40348	0.02188	0.05579	0.00087	306	95	344	16	350	5	350	5
Zr.13	86.49	164.53	0.525679	0.05298	0.00321	0.39101	0.02325	0.05354	0.00089	328	105	335	17	336	5	336	5
Zr.14	77.52	161.17	0.480983	0.05816	0.00349	0.44201	0.02596	0.05513	0.00093	536	99	372	18	346	6	346	6
Zr.15	172.98	160.79	1.07581	0.05325	0.0033	0.39363	0.0239	0.05363	0.00091	339	107	337	17	337	6	337	6
Zr.16	75.88	87.95	0.862763	0.05683	0.00475	0.40663	0.03328	0.05191	0.0011	485	144	346	24	326	7	326	7
Zr.17	152.36	240.3	0.634041	0.05439	0.00276	0.41218	0.0205	0.05498	0.00082	387	85	350	15	345	5	345	5
Zr.18	8.29	277.86	0.0298352	0.05355	0.00198	0.43858	0.01595	0.05942	0.00077	352	59	369	11	372	5	372	5
Zr.19	247.75	205.59	1.20507	0.05308	0.003	0.39016	0.02161	0.05333	0.00085	332	97	334	16	335	5	335	5
Zr.20	93.59	119	0.786471	0.0564	0.00413	0.41506	0.02977	0.0534	0.00101	468	126	353	21	335	6	335	6
Zr.21	251.01	215.45	1.16505	0.05704	0.00383	0.40067	0.02633	0.05096	0.00092	493	113	342	19	320	6	320	6
Zr.22	49.63	85.73	0.578911	0.05275	0.00469	0.44206	0.03858	0.0608	0.00125	318	160	372	27	380	8	380	8
Zr.23	55.35	122.47	0.451947	0.05326	0.00405	0.40032	0.02991	0.05453	0.00103	340	135	342	22	342	6	342	6
Zr.24	127.33	205.22	0.620456	0.05132	0.00291	0.3969	0.0221	0.05611	0.00089	255	99	339	16	352	5	352	5
Zr.25	89.81	172.18	0.521605	0.0552	0.00346	0.39132	0.02405	0.05144	0.00088	420	107	335	18	323	5	323	5
Zr.26	265.76	278.22	0.955215	0.04958	0.00299	0.3724	0.02217	0.05449	0.00082	175	108	321	16	342	5	342	5
Zr.27	103.27	120.32	0.858295	0.05587	0.004	0.42409	0.02975	0.05508	0.00104	447	123	359	21	346	6	346	6
Zr.28	204.83	325.33	0.629607	0.05454	0.00243	0.41233	0.01799	0.05486	0.00078	393	72	351	13	344	5	344	5
Zr.29	144.29	156.22	0.923633	0.05427	0.00341	0.41945	0.02582	0.05608	0.00096	382	108	356	18	352	6	352	6
Zr.30	143.11	221.32	0.64662	0.05125	0.00289	0.38343	0.02124	0.05429	0.00085	252	99	330	16	341	5	341	5
Zr.31	162.73	215.74	0.754288	0.05405	0.00313	0.38027	0.02161	0.05105	0.00083	373	99	327	16	321	5	321	5
Zr.32	60.5	97.13	0.622877	0.04983	0.00422	0.37272	0.03097	0.05427	0.00112	187	149	322	23	341	7	341	7
Zr.33	95.68	155.22	0.616415	0.05901	0.0036	0.47194	0.02818	0.05804	0.00099	567	100	393	19	364	6	364	6
Zr.34	200.4	140.69	1.42441	0.05599	0.00394	0.39466	0.02717	0.05115	0.00095	452	120	338	20	322	6	322	6
Zr.35	53.87	109.74	0.490888	0.05565	0.00398	0.48327	0.03385	0.06302	0.00118	438	123	400	23	394	7	394	7
Zr.36	28.81	43.39	0.663978	0.05606	0.00701	0.40831	0.04996	0.05285	0.00154	455	221	348	36	332	9	332	9
Zr.37	108.87	178.21	0.610908	0.05167	0.00317	0.40896	0.02466	0.05744	0.00095	271	108	348	18	360	6	360	6
Zr.38	102.14	145.06	0.704122	0.0522	0.00373	0.37562	0.02635	0.05222	0.00095	294	127	324	19	328	6	328	6
Zr.39	268.07	223.05	1.20184	0.05458	0.003	0.41493	0.02239	0.05517	0.00087	395	93	352	16	346	5	346	5
Zr.40	269.24	250.01	1.07692	0.0561	0.00289	0.40818	0.02065	0.0528	0.00081	456	85	348	15	332	5	332	5
Zr.41	64.75	125.21	0.517131	0.05807	0.00408	0.43594	0.02999	0.05447	0.00102	532	118	367	21	342	6	342	6
Zr.42	55.88	124.48	0.448907	0.05247	0.00405	0.37971	0.02874	0.05252	0.001	306	138	327	21	330	6	330	6
Zr.43	217.89	239.98	0.907951	0.05722	0.0028	0.49021	0.02353	0.06217	0.00093	500	79	405	16	389	6	389	6
Zr.44	148.18	162.72	0.910644	0.05264	0.00355	0.36936	0.02441	0.05092	0.0009	313	119	319	18	320	6	320	6
Zr.45	103.17	145.28	0.710146	0.05025	0.00362	0.36976	0.02611	0.05339	0.00098	207	127	319	19	335	6	335	6
Zr.46	64.12	113.61	0.564387	0.05428	0.00417	0.41233	0.03104	0.05512	0.00107	383	135	351	22	346	7	346	7
Zr.47	30.42	53.21	0.571697	0.05284	0.00676	0.38564	0.04848	0.05296	0.00142	322	234	331	36	333	9	333	9
Zr.48	154.66	131.06	1.18007	0.05811	0.0041	0.42438	0.02931	0.053	0.00099	534	119	359	21	333	6	333	6
Zr.49	193.69	197.37	0.981355	0.05311	0.00312	0.4126	0.02379	0.05637	0.00091	333	102	351	17	354	6	354	6
Zr.50	197.48	308.67	0.639777	0.0546	0.00255	0.41479	0.01903	0.05513	0.0008	396	77	352	14	346	5	346	5
Zr.51	133.08	183.02	0.727134	0.05044	0.00316	0.37555	0.02311	0.05403	0.0009	215	111	324	17	339	6	339	6
Zr.52	170.58	156.3	1.09136	0.05726	0.00386	0.41705	0.02755	0.05285	0.00095	502	114	354	20	332	6	332	6
Zr.53	81.35	112.48	0.72324	0.05553	0.00431	0.41977	0.03192	0.05485	0.00109	434	135	356	23	344	7	344	7
Zr.54	120.14	193.45	0.621039	0.05633	0.00463	0.41707	0.03353	0.0537	0.00094	465	188	354	24	337	6	337	6
Zr.55	56.11	102.02	0.54999	0.05335	0.00433	0.40789	0.03242	0.05548	0.00113	344	144	347	23	348	7	348	7
Zr.56	47.89	115.07	0.416181	0.05234	0.00415	0.39007	0.03036	0.05408	0.00107	300	141	334	22	340	7	340	7
Zr.57	196.39	206.43	0.951364	0.05074	0.00294	0.39403	0.02246	0.05635	0.00089	229	102	337	16	353	5	353	5
Zr.58	123.21	184.24	0.668747	0.05419	0.00308	0.44559	0.0249	0.05967	0.00096	379	97	374	17	374	6	374	6
Zr.59	73.06	125.32	0.582988	0.05258	0.00379	0.40692	0.02877	0.05615	0.00103	311	128	347	21	352	6	352	6
Zr.60	75.13	114.13	0.658284	0.05412	0.00414	0.42204	0.0317	0.05659	0.00109	376	135	358	23	355	7	355	7
Zr.61	129.77	140.88	0.921139	0.0525	0.00363	0.39878	0.02706	0.05512	0.00099	307	122	341	20	346	6	346	6
Zr.62	72.48	102.06	0.71017	0.05421	0.00438	0.43314	0.03436	0.05798	0.00115	380	144	365	24	363	7	363	7
Zr.63	183.42	214.25	0.856103	0.05609	0.00308	0.43311	0.02332	0.05603	0.00089	456	91	365	17	351	5	351	5
Zr.64	95.17	164.64	0.578049	0.05402	0.00348	0.39834	0.02515	0.05351	0.00092	372	111	340	18	336	6	336	6
Zr.65	111.17	100.15	1.11003	0.05224	0.00439	0.4127	0.03403	0.05733	0.00115	296	151	351	24	359	7	359	7
Zr.66	59.16	98.28	0.601954	0.05522	0.00423	0.5081	0.03819	0.06676	0.00129	421	134	417	26	417	8	417	8
Zr.67	153.35	238.34	0.643409	0.05531	0.00286	0.42139	0.02143	0.05528	0.00084	425	86	357	15	347	5	347	5
Zr.68	263.13	336.83	0.781195	0.05474	0.00237	0.41302	0.01761	0.05475	0.00077	402	70	351	13	344	5	344	5
Zr.69	96.18	173.3	0.554991	0.05177	0.00337	0.38471	0.0246	0.05392	0.00091	275	116	330	18	339	6	339	6
Zr.70	94.67	119.54	0.791952	0.05174	0.00384	0.4072	0.02967	0.0571	0.00106	274	133	347	21	358	6	358	6
Zr.71	52.41	93.09	0.563004	0.05152	0.00455	0.41219	0.03574	0.05805	0.00122	264	158	350	26	364	7	364	7
Zr.72	55.76	80.56	0.692155	0.05417	0.00491	0.41172	0.03658	0.05515	0.0012	378	162	350	26	346	7	346	7
Zr.73	134.2	158.62	0.846047	0.05366	0.00359	0.3885	0.02548	0.05254	0.00092	357	117	333	19	330	6	330	6
Zr.74	77.14	115.02	0.670666	0.05155	0.00388	0.41182	0.03042	0.05796	0.00108	266	134	350	22	363	7	363	7
Zr.75	33.1	51.44	0.643468	0.0547	0.00616	0.40677	0.04488	0.05396	0.00142	400	200	347	32	339	9	339	9
Zr.76	83.61	158.63	0.527076	0.05311	0.00337	0.3909	0.02435	0.05341	0.00091	333	111	335	18	335	6	335	6
Zr.77	98.93	112.49	0.879456	0.05673	0.0042	0.41517	0.03012	0.0531	0.00102	481	127	353	22	334	6	334	6
Zr.78	48.9	66.23	0.738336	0.0522	0.00527	0.41382	0.04106	0.05752	0.00131	294	183	352	29	361	8	361	8
Zr.79	101.16	91.63	1.10401	0.05047	0.00437	0.38832	0.03303	0.05582	0.00116	217	153	333	24	350	7	350	7
Zr.80	126.98	152.21	0.834242	0.05707	0.00352	0.44013	0.02661	0.05596	0.00096	494	103	370	19	351	6	351	6
Zr.81	64.15	102.25	0.627384	0.05192	0.00408	0.41184	0.0318	0.05755	0.00111	282	140	350	23	361	7	361	7
Zr.82	178.43	209.51	0.851654	0.05471	0.00287	0.45931	0.02368	0.06091	0.00093	400	88	384	16	381	6	381	6
Zr.83	63.94	110.89	0.576607	0.05698	0.0042	0.43193	0.03123	0.05499	0.00106	491	126	365	22	345	6	345	6
Zr.84	115.27	175.13	0.658197	0.04987	0.0031	0.38048	0.02327	0.05535	0.00091	189	109	327	17	347	6	347	6
Zr.85	128.09	195.04	0.656737	0.05062	0.00293	0.39357	0.02239	0.0564	0.0009	224	102	337	16	354	5	354	5
Zr.86	81.72	116.09	0.703937	0.05395	0.00389	0.41114	0.02905	0.05529	0.00104	369	126	350	21	347	6	347	6
Zr.87	123.88	182.65	0.678237	0.05306	0.00314	0.40966	0.02379	0.05601	0.00091	331	102	349	17	351	6	351	6
Tailegula Formation, sandstone t-18
Zr.1	157.87	237.5	0.664716	0.05588	0.00396	0.41612	0.02881	0.05413	0.00099	448	122	353	21	340	6	340	6
Zr.2	105.98	182.33	0.581254	0.05155	0.00433	0.36269	0.02986	0.05115	0.00103	266	150	314	22	322	6	322	6
Zr.3	51.48	75.89	0.67835	0.05129	0.00686	0.36268	0.04753	0.0514	0.00152	254	240	314	35	323	9	323	9
Zr.4	62.48	166.15	0.376046	0.0527	0.00567	0.37046	0.03909	0.05098	0.00108	316	247	320	29	321	7	321	7
Zr.5	57.44	67.74	0.847948	0.04979	0.00951	0.3388	0.06387	0.04935	0.00153	185	355	296	48	311	9	311	9
Zr.6	198.5	212.33	0.934866	0.05299	0.00433	0.36703	0.0294	0.05034	0.00099	328	146	317	22	317	6	317	6
Zr.7	46.27	96.19	0.481027	0.0521	0.00611	0.38817	0.04456	0.05415	0.00145	290	209	333	33	340	9	340	9
Zr.8	85.52	158.04	0.541129	0.04986	0.00465	0.37072	0.03388	0.05404	0.00118	188	165	320	25	339	7	339	7
Zr.9	410.63	303.85	1.35142	0.05138	0.0034	0.39059	0.02535	0.05524	0.00094	258	118	335	19	347	6	347	6
Zr.10	60.54	119.9	0.504921	0.0574	0.00568	0.43592	0.04214	0.05519	0.00133	507	172	367	30	346	8	346	8
Zr.11	36.23	68.84	0.526293	0.05554	0.00762	0.41516	0.0557	0.05432	0.0017	434	244	353	40	341	10	341	10
Zr.12	67.21	110.49	0.60829	0.05201	0.00604	0.37919	0.04318	0.05297	0.00135	286	209	326	32	333	8	333	8
Zr.13	16.33	46.85	0.348559	0.05434	0.00883	0.43248	0.06884	0.05783	0.0021	385	288	365	49	362	13	362	13
Zr.14	63.16	99.22	0.636565	0.05473	0.00617	0.41527	0.04579	0.05513	0.00145	401	200	353	33	346	9	346	9
Zr.15	26.03	41.98	0.620057	0.05147	0.00971	0.38075	0.07048	0.05375	0.00215	262	312	328	52	338	13	338	13
Zr.16	68.86	139.47	0.493726	0.0626	0.00546	0.49933	0.04248	0.05795	0.00131	695	144	411	29	363	8	363	8
Zr.17	39	81.4	0.479115	0.05511	0.0075	0.39654	0.05282	0.05227	0.00159	417	244	339	38	328	10	328	10
Zr.18	38.82	72.31	0.536855	0.05056	0.00728	0.3755	0.05297	0.05395	0.0017	221	256	324	39	339	10	339	10
Zr.19	64.23	110.07	0.583538	0.05441	0.00626	0.3851	0.04333	0.05141	0.00138	388	204	331	32	323	8	323	8
Zr.20	69.97	89.44	0.782312	0.05301	0.00672	0.39775	0.04938	0.0545	0.00156	329	227	340	36	342	10	342	10
Zr.21	105.08	148.15	0.709281	0.05403	0.00537	0.40149	0.03903	0.05398	0.00126	372	177	343	28	339	8	339	8
Zr.22	254.14	333.3	0.762496	0.05026	0.00347	0.35023	0.02366	0.05062	0.00088	207	122	305	18	318	5	318	5
Zr.23	28.86	52.89	0.545661	0.05376	0.00956	0.38613	0.06732	0.05216	0.00196	361	317	332	49	328	12	328	12
Zr.24	123.82	156.65	0.790425	0.05065	0.005	0.36164	0.03499	0.05185	0.00119	225	176	313	26	326	7	326	7
Zr.25	72.46	157.36	0.460473	0.05124	0.00494	0.38374	0.03622	0.05438	0.00122	252	171	330	27	341	7	341	7
Zr.26	30.36	80.75	0.375975	0.05734	0.00738	0.42011	0.05285	0.0532	0.00161	505	226	356	38	334	10	334	10
Zr.27	109.6	145.41	0.753731	0.05307	0.00517	0.41766	0.03982	0.05715	0.00133	332	173	354	29	358	8	358	8
Zr.28	72.31	121.29	0.596174	0.05065	0.00577	0.36166	0.04031	0.05185	0.00139	225	201	313	30	326	9	326	9
Zr.29	118.85	158.94	0.747766	0.05163	0.00504	0.37824	0.03619	0.05319	0.00122	269	174	326	27	334	7	334	7
Zr.30	66.24	131.92	0.502122	0.05136	0.00551	0.37427	0.03935	0.05291	0.00131	257	191	323	29	332	8	332	8
Zr.31	163.72	222.32	0.736416	0.05118	0.0053	0.35519	0.03602	0.05038	0.00121	249	184	309	27	317	7	317	7
Zr.32	27.68	74.03	0.373902	0.05147	0.00733	0.37953	0.05299	0.05353	0.00168	262	253	327	39	336	10	336	10
Zr.33	15.98	42.36	0.377243	0.04781	0.00989	0.35169	0.07149	0.0534	0.0022	90	307	306	54	335	13	335	13
Zr.34	198.83	452.74	0.43917	0.05203	0.00307	0.36127	0.02087	0.05041	0.0008	287	103	313	16	317	5	317	5
Zr.35	202.83	304.49	0.66613	0.05179	0.00373	0.35864	0.02527	0.05027	0.00091	276	128	311	19	316	6	316	6
Zr.36	118.91	124.45	0.955484	0.04946	0.00531	0.3999	0.04208	0.05869	0.00144	170	191	342	31	368	9	368	9
Zr.37	69.61	123.16	0.5652	0.04853	0.0055	0.3728	0.04141	0.05576	0.0014	125	202	322	31	350	9	350	9
Zr.38	30.9	74.29	0.415938	0.05402	0.00735	0.43628	0.05806	0.05862	0.00184	372	242	368	41	367	11	367	11
Zr.39	59.61	92.29	0.645899	0.0531	0.00673	0.39683	0.04924	0.05424	0.00156	333	226	339	36	341	10	341	10
Zr.40	41.69	72.22	0.577264	0.05241	0.00821	0.36329	0.05568	0.0503	0.00175	303	277	315	41	316	11	316	11
Zr.41	54.18	83.29	0.650498	0.05501	0.00728	0.38809	0.05023	0.0512	0.00157	413	235	333	37	322	10	322	10
Zr.42	135.92	251.06	0.541385	0.04927	0.0036	0.41456	0.02968	0.06106	0.00111	161	127	352	21	382	7	382	7
Zr.43	116.56	162.46	0.717469	0.05006	0.00497	0.36345	0.03532	0.05269	0.00121	198	176	315	26	331	7	331	7
Zr.44	40.85	87.84	0.46505	0.05873	0.0066	0.51896	0.05693	0.06412	0.00176	557	194	424	38	401	11	401	11
Zr.45	19.76	43.53	0.45394	0.05872	0.00888	0.59688	0.08817	0.07376	0.00264	557	264	475	56	459	16	459	16
Zr.46	81.08	135.02	0.600504	0.05093	0.0055	0.38519	0.04076	0.05488	0.00135	238	193	331	30	344	8	344	8
Zr.47	42.55	89.03	0.477929	0.04729	0.00636	0.35622	0.04705	0.05465	0.00158	64	225	309	35	343	10	343	10
Zr.48	66.18	175.05	0.378063	0.04966	0.00462	0.38083	0.03468	0.05563	0.00122	179	164	328	26	349	7	349	7
Zr.49	55.95	108.54	0.515478	0.04826	0.00586	0.35333	0.04206	0.05312	0.00143	112	213	307	32	334	9	334	9
Zr.50	179.71	349.71	0.513883	0.05687	0.00455	0.43471	0.03395	0.05544	0.00096	486	182	367	24	348	6	348	6
Zr.51	69.47	79.98	0.868592	0.05093	0.00705	0.38528	0.05229	0.05487	0.00166	238	246	331	38	344	10	344	10
Zr.52	70.19	127.94	0.548617	0.04964	0.00538	0.38126	0.04045	0.0557	0.00138	178	192	328	30	349	8	349	8
Zr.53	73.09	95.37	0.766384	0.04882	0.00649	0.34254	0.04462	0.05089	0.00149	139	234	299	34	320	9	320	9
Zr.54	71.78	107.29	0.669028	0.04821	0.00631	0.33853	0.04348	0.05092	0.00144	110	229	296	33	320	9	320	9
Zr.55	58.15	105.93	0.548947	0.05337	0.00666	0.3752	0.04582	0.05098	0.00144	345	223	324	34	321	9	321	9
Zr.56	58.04	124.21	0.467273	0.052	0.00572	0.38483	0.04141	0.05366	0.00138	285	195	331	30	337	8	337	8
Zr.57	230.47	217.59	1.05919	0.05009	0.00414	0.36363	0.02944	0.05264	0.00106	199	145	315	22	331	6	331	6
Zr.58	117.69	124.62	0.944391	0.05137	0.00552	0.38918	0.04095	0.05493	0.00137	257	191	334	30	345	8	345	8
Zr.59	139.11	347.13	0.400743	0.05195	0.00331	0.39579	0.02464	0.05523	0.00093	283	112	339	18	347	6	347	6
Zr.60	28.12	72.21	0.38942	0.05203	0.00726	0.39152	0.05342	0.05455	0.00173	287	249	335	39	342	11	342	11
Zr.61	34.96	68.93	0.507181	0.05287	0.0074	0.38905	0.05326	0.05334	0.00172	323	249	334	39	335	11	335	11
Zr.62	30.78	66.03	0.466152	0.05291	0.00736	0.41869	0.05703	0.05736	0.00182	325	249	355	41	360	11	360	11
Zr.63	17.92	51.16	0.350274	0.05154	0.00867	0.41022	0.06766	0.05769	0.00212	265	290	349	49	362	13	362	13
Zr.64	49.87	89.96	0.554357	0.05288	0.0067	0.37224	0.04613	0.05102	0.0015	324	225	321	34	321	9	321	9
Zr.65	409.61	278.42	1.47119	0.04832	0.00342	0.3771	0.02615	0.05655	0.001	115	122	325	19	355	6	355	6
Zr.66	29.87	59.85	0.499081	0.05185	0.00806	0.37719	0.05747	0.05271	0.00181	279	277	325	42	331	11	331	11
Zr.67	21.91	81.67	0.268275	0.0544	0.00702	0.39605	0.04995	0.05275	0.00158	388	229	339	36	331	10	331	10
Tailegula Formation, sedimentary tuff t-39
Zr.1	59.46	72.65	0.818445	0.05289	0.00613	0.37013	0.0419	0.0507	0.00138	324	205	320	31	319	8	319	8
Zr.2	61.51	102.14	0.602213	0.05487	0.00588	0.3824	0.03998	0.0505	0.00132	407	188	329	29	318	8	318	8
Zr.3	133.05	167.9	0.792436	0.05469	0.00425	0.36729	0.02785	0.04867	0.00097	400	135	318	21	306	6	306	6
Zr.4	164.88	207.63	0.794105	0.05374	0.00613	0.35724	0.04006	0.04821	0.00103	360	261	310	30	304	6	304	6
Zr.5	409.92	308.72	1.32781	0.05182	0.00397	0.35504	0.02657	0.04968	0.00096	277	135	309	20	313	6	313	6
Zr.6	125.53	129.65	0.968222	0.04959	0.00563	0.33884	0.03764	0.04956	0.00131	176	200	296	29	312	8	312	8
Zr.7	268.92	238.59	1.12712	0.05356	0.00254	0.36402	0.01682	0.0493	0.00069	353	79	315	13	310	4	310	4
Zr.8	147.67	113.94	1.29603	0.05772	0.00374	0.39292	0.02481	0.04938	0.00087	519	108	337	18	311	5	311	5
Zr.9	529.23	1242.63	0.425895	0.05252	0.00214	0.35541	0.01392	0.04908	0.00056	308	95	309	10	309	3	309	3
Zr.10	391.01	1174.72	0.332854	0.05397	0.00122	0.37263	0.00813	0.05009	0.00052	370	31	322	6	315	3	315	3
Zr.11	111.86	214.35	0.521857	0.0544	0.00343	0.36862	0.02269	0.04917	0.00082	388	109	319	17	309	5	309	5
Zr.12	227.43	216.01	1.05287	0.05416	0.00361	0.37412	0.02433	0.05012	0.00088	378	115	323	18	315	5	315	5
Zr.13	84.68	108.78	0.778452	0.05451	0.00489	0.37526	0.03285	0.04995	0.0011	392	158	324	24	314	7	314	7
Zr.14	108.75	143.07	0.760117	0.05196	0.00336	0.35864	0.02265	0.05008	0.00085	284	114	311	17	315	5	315	5
Zr.15	462.93	339.41	1.36393	0.05493	0.00258	0.37901	0.01733	0.05007	0.0007	409	77	326	13	315	4	315	4
Zr.16	102.72	154.36	0.665457	0.05717	0.00393	0.40135	0.02691	0.05095	0.00093	498	116	343	19	320	6	320	6
Zr.17	252.01	274.57	0.917835	0.05286	0.00441	0.36172	0.02948	0.04966	0.00104	323	147	313	22	312	6	312	6
Zr.18	696.67	967.67	0.719946	0.05547	0.00203	0.37622	0.01339	0.04922	0.00061	431	57	324	10	310	4	310	4
Zr.19	120.57	104.55	1.15323	0.05165	0.00413	0.34771	0.02717	0.04886	0.00096	270	142	303	20	308	6	308	6
Zr.20	496.86	408.82	1.21535	0.05373	0.00281	0.36517	0.01865	0.04933	0.00074	360	88	316	14	310	5	310	5
Zr.21	135.56	175.29	0.773347	0.05668	0.00545	0.40375	0.03787	0.0517	0.00125	479	166	344	27	325	8	325	8
Zr.22	94.65	116.15	0.814895	0.05643	0.00465	0.38656	0.03106	0.04972	0.00103	469	142	332	23	313	6	313	6
Zr.23	257.4	320.13	0.804048	0.05843	0.0044	0.39703	0.02921	0.04928	0.00078	546	170	339	21	310	5	310	5
Zr.24	104.18	134.93	0.772104	0.05204	0.00484	0.35334	0.03211	0.04928	0.00111	287	164	307	24	310	7	310	7
Zr.25	492.61	319.8	1.54037	0.04993	0.00385	0.34507	0.026	0.05016	0.00096	192	135	301	20	316	6	316	6
Zr.26	96.54	107.12	0.901232	0.05366	0.00504	0.36563	0.03355	0.04946	0.00113	357	166	316	25	311	7	311	7
Zr.27	105.58	118.05	0.894367	0.0547	0.00419	0.37385	0.02797	0.04961	0.00097	400	133	323	21	312	6	312	6
Zr.28	182.21	292.05	0.6239	0.05389	0.00312	0.37074	0.02093	0.04993	0.00079	366	99	320	16	314	5	314	5
Zr.29	283.35	345.04	0.821209	0.055	0.00315	0.37649	0.021	0.04968	0.00079	412	96	324	15	313	5	313	5
Zr.30	50.67	61.52	0.823635	0.05177	0.00733	0.3552	0.04918	0.0498	0.00159	275	253	309	37	313	10	313	10
Zr.31	97.07	97.55	0.995079	0.0541	0.00679	0.36721	0.04501	0.04926	0.00146	375	222	318	33	310	9	310	9
Zr.32	60.27	75.56	0.797644	0.05035	0.00612	0.34097	0.04069	0.04915	0.00127	211	221	298	31	309	8	309	8
Zr.33	98.99	107.36	0.922038	0.0517	0.00491	0.35547	0.03301	0.04991	0.00113	272	169	309	25	314	7	314	7
Zr.34	325.22	212.5	1.53045	0.05204	0.00313	0.35775	0.021	0.04989	0.0008	287	105	311	16	314	5	314	5
Zr.35	18.79	53.83	0.349062	0.05318	0.00725	0.36138	0.04821	0.04931	0.0015	336	244	313	36	310	9	310	9
Zr.36	430.56	253.98	1.69525	0.05152	0.00549	0.34832	0.0363	0.04907	0.00123	264	188	303	27	309	8	309	8
Zr.37	237.69	250.05	0.95057	0.05275	0.00339	0.36332	0.0228	0.04998	0.00085	318	112	315	17	314	5	314	5
Zr.38	126.04	237.83	0.529958	0.0518	0.00423	0.35541	0.0284	0.04979	0.00101	277	144	309	21	313	6	313	6
Zr.39	389.13	374.07	1.04026	0.05359	0.00417	0.36847	0.02801	0.04989	0.00098	354	137	319	21	314	6	314	6
Zr.40	78.94	129.22	0.610896	0.05387	0.00534	0.36684	0.03552	0.04941	0.00118	366	175	317	26	311	7	311	7
Zr.41	47.04	81.46	0.577461	0.05474	0.00562	0.36965	0.03715	0.04899	0.00118	402	183	319	28	308	7	308	7
Zr.42	191.48	175.87	1.08876	0.05759	0.00456	0.39137	0.03025	0.0493	0.001	514	135	335	22	310	6	310	6
Zr.43	536.85	381.74	1.40632	0.05543	0.00308	0.38038	0.02062	0.04978	0.00078	430	93	327	15	313	5	313	5
Zr.44	270.24	320.33	0.84363	0.05473	0.00334	0.37602	0.02243	0.04984	0.00083	401	104	324	17	314	5	314	5
Zr.45	624.49	1443.96	0.432484	0.05539	0.00172	0.3754	0.01142	0.04917	0.00057	428	47	324	8	309	4	309	4
Zr.46	69.93	142.1	0.492118	0.05154	0.00626	0.35268	0.04189	0.04963	0.00139	265	216	307	31	312	9	312	9
Zr.47	169.14	172.5	0.980522	0.05811	0.00421	0.39588	0.02799	0.0494	0.00094	534	122	339	20	311	6	311	6
Zr.48	222.34	296.02	0.751098	0.05104	0.00446	0.34759	0.02972	0.04937	0.00104	243	155	303	22	311	6	311	6
Zr.49	92.83	133.62	0.694731	0.05392	0.00496	0.36686	0.03298	0.04932	0.00112	368	162	317	24	310	7	310	7
